# Genome-wide characterization and expression profiling of B3 superfamily during flower induction stage in pineapple (*Ananas comosus* L.)

Cheng Cheng Ruan, Zhe Chen, Fu Chu Hu, Xiang He Wang, Li Jun Guo, Hong Yan Fan, Zhi Wen Luo, Zhi Li Zhang\*

Key Laboratory of Tropical Fruit Tree Biology of Hainan Province, Institute of Tropical Fruit Trees, Hainan Academy of Agricultural Sciences, Haikou, 571100, China

\* Correspondence: [zzl\\_haas@163.com](mailto:zzl_haas@163.com)

**Abstract:** The B3 superfamily is a plant-specific family, which involves in growth and development process. By now, the identification of B3 superfamily in pineapple (*Ananas comosus*) has not reported. In this study, 57 B3 genes were identified and further phylogenetically classified into five subfamilies, all genes contained B3 domain. Chromosomal localization analysis revealed that 54 of 57 *AcB3* genes were located on 21 chromosomes. Collinearity analysis indicated that the segmental duplication was the main event in the evolution of B3 gene superfamily and most of them were under purifying selection. Moreover, there were 7 and 39 pairs of orthologous B3s were identified between pineapple and *Arabidopsis* or rice, respectively, which indicated the closer genetic relationship between pineapple and rice. Most genes had *cis*-element of abscisic acid, ethylene, MeJA, light, and abiotic stress. qRT-PCR showed that the expression level of most *AcB3* genes were up-regulated within 1 d after ethephon treatment and expressed high level in flower bud differentiation period in stem apex. This study provide a comprehensive understanding of *AcB3s* and a basis for future molecular studies of ethephon induced pineapple flowering.

**Keywords:** B3; Pineapple; Flower; Genome-wide

## Introduction

Transcription factor (TF) is a protein with special structure which regulating gene expression by binding to transcriptional regulatory regions, also known as trans-acting factors [1-2]. There are about 2000 TFs in *Arabidopsis thaliana*, they play the role mainly in biotic and abiotic stress response, organ development such as flowering, hormone signal response, cell growth and differentiation [3]. Flowering is an important process, which has a direct impact on the reproduction and yield of plants [4]. Many TFs are involved in flowering: *AP2*, *bHLH*, *bZIP*, *MADS* and *B3* [5-6].

The B3-type DNA binding domain (DBD) was first found in *VIVIPAROUS1* (*VPI*) from *Zea mays*, all members of the B3 superfamily contain this domain, and this kind of TF is only exist in plant [7-8]. The number of B3 superfamily gene differs in different plant, there are 118, 91, 81, 108 B3 genes in *Arabidopsis thaliana*, *Oryza sativa*, *Zea mays*, *Glycine max*, respectively [9-10]. Base on the structure and function of protein, the B3 superfamily can be divided into five members: *auxin response factor* (*ARF*), *Leafy Cotyledon 2* (*LEC2*)-*Abscisic Acid Insensitive 3* (*ABI3*)-*VAL* (*LAV*), *high level expression of sugar inducible* (*HIS*), *related to ABI3/VPI* (*RAV*) and *reproductive meristem* (*REM*) [11-12]. In *Arabidopsis thaliana*, *ABI3* (one B3 domain), *HIS* (one B3 domain and zf-CW domain), *ARF* (one B3 domain, auxin response factor and AUX/IAA domain), *RAV* (one B3 domain and AP2 domain) and *REM* (two B3 domains) have different typical domains [13]. The B3 superfamily plays an important role in plant growth and development as well as stress response [14-15]. ARFs have the function in development of flowers and leaves, vascular tissue differentiation and root initiation [16-17]. In *Arabidopsis thaliana*, *arf1* and *arf2* mutant plant exhibit development delay, including initiation of flowering and rosette leaf senescence [18]. The double mutant *arf7 arf19* influenced the growth of root and leaf expansion [19]. The study of *LAV* is few, it mainly participates in regulation of seed germination, embryo development and stress response [20-23]. *AtABI3* induced lateral root primordia by auxin, the root of loss-of-function *abi3* alleles show insensitivity to auxin [24]. The *LEC2* induces the somatic embryo formation and promotes the accumulation of seed storage protein and oil bodies [25]. As a transcriptional repressor, *HIS* has a function to repress the seed maturation genes [26]. Recently, a study showed

*HSI2* repress *AGL15* (relate to seed development) by the PRC2 component MSI1, thereby regulating seed maturation [27]. Many studies showed the *RAV* is related to stress response, for example, overexpression of cotton *RAV1* Gene in *Arabidopsis* increased the sensitivity of salinity and drought stresses [28]. On the other hand, *TEM* (*TEMPRANILLO*) gene (a member of RAV family) downregulate the expression of *FT*, so as to repress flowering [29]. The *REM* is latest studied and little is known about its function. *AtREM34* is the first gene be identified but *VRNI* (*VERNALIZATION1/REM5*) is the first to be functionally characterized, *VRNI* is related to vernalization and promote flowering [6, 30]. Recently, a study silenced *REM34* and *REM35* genes and influenced the female and male gametophyte development [31]. These indicate that *REMs* play roles in flowering.

Pineapple (*Ananas comosus* (Linn.) Merr) is the herbaceous plant of *Bromeliaceae* family. It is one of the four tropical fruits in the world, which is planted in more than 80 countries or regions [32]. There are mainly two ways to induce pineapple flowering: natural flowering induction and artificial flowering induction. Natural flowering induction needs short day-length and cool night temperatures to produce endogenous ethylene, artificial flowering induction use chemicals like ethephon or calcium carbide to release ethylene [33-35]. However, in natural flowering induction, the uniformity of flowering is often inconsistent or pineapples in the planting area cannot be centralized in the market. Artificial flowering induction usually used in commercial production, it can effectively improve flowering regularity and flowering rate, and effectively plan the time to market, so as to achieve the purpose of improving pineapple planting efficiency [36]. There are many genes related to ethylene or flowering which studied in pineapple, but the mechanism of ethylene induces pineapple flowering is unclear.

The articles about B3 superfamily is little by now, just in several plant species, meanwhile, the genome-wide analyses about B3 superfamily in pineapple hasn't been reported. The members of B3 superfamily play roles on flowering, it's unclear whether the B3 superfamily genes involve in pineapple ethylene response and flowering. In this study, 57 pineapple *B3* genes were identified. We did comprehensive analysis of gene duplications, chromosome distribution, gene structure and *cis*-acting regulatory elements. Phylogeny were analysed with the *B3* genes of *Arabidopsis* and rice. The expression patterns of *AcB3* genes after ethephon treatment were showed by RNA-Seq data. Expression profiles after ethephon treatment were evaluated by qRT-PCR to analyse the relationship between *B3* and ethephon. This study provided reference for further understanding of the physiological function and mechanism of *B3* genes in ethephon induced pineapple flower formation.

## Materials and methods

### Identification and analysis of *B3* genes in pineapple

To identify *AcB3* genes, The genome of *Ananas comosus* were downloaded from the PGD (Pineapple Genomics database)(<http://pineapple.angiosperms.org/pineapple/html/index.html>). The HMM (hidden Markov model) matrix of B3 domain (PF02362) was downloaded from Pfam, and then *B3* genes were retrieved by Hmmer 3.0 software. These predicted B3 proteins were further confirmed and analyzed using the CD-search (<https://www.ncbi.nlm.nih.gov/Structure/cdd/wrpsb.cgi>) and SMART (<http://smart.embl-heidelberg.de>) web server. All pineapple *B3* genes contained B3 domain.

### Chromosomal locations and synteny analysis

The physical locations of *AcB3* genes were obtained from the PGD. The location images of *AcB3* genes were drawn by MapChart software [37]. Multiple Collinearity Scan toolkit (MCscanX) was used to analyse the tandem and segmental duplications of *B3* genes [38]. The diagrams of synteny analysis were drawn by Tbtools [39]. The value of Ks and Ka were calculated by using DnaSP 5 [40] software.

### Phylogenetic analysis

Multiple sequence alignments and phylogenetic tree of full-length B3 proteins from pineapple, *Arabidopsis*

and rice were performed using PhyML 3.0 with maximum likelihood (ML) method, ‘AIC’ criterion and ‘aLRT Chi2-based’ as fast likelihood-based method [41]. The classifications of *AcB3s* were given according to the lists of *AtB3* and *OsB3* genes came from previous study [13]. The sequences of *AtB3* and *OsB3* genes were downloaded from Phytozome 12.1.6 (<https://phytozome.jgi.doe.gov/pz/portal.html>).

## Structural and motif analyses of *AcB3* genes

The exon/intron organizations picture of the *AcB3* genes were drawn by TBtools. The conserved motifs were analyzed using MEME (<http://meme-suite.org/tools/meme>) [42], searching up to 20 conserved motifs and each motif was set from 6 to 50 residues. Protein domains were identified using the NCBI CD-search and SMART.

## Analysis of *cis*-acting elements and gene ontology

The 2kb promoter region upstream of the start codon of each gene was downloaded from PGD to analyse the possible *cis*-acting elements of *B3* genes by PlantCARE (<http://bioinformatics.psb.ugent.be/webtools/plantcare/html/>) online server. WEGO (<http://wego.genomics.org.cn/>) was used to analyse Gene ontology of *B3* proteins.

## Plant materials and treatments

The pineapple hybrid variety was "Tainong 16" is cultivated in the pineapple planting base of Chengmai County, Hainan Province, China. The temperature, humidity and other environmental conditions in the greenhouse which controlled in the appropriate range for pineapple flowering. The pineapple which grew 25 mature leaves (more than 30 cm in length) were treated by 300 fold solution of 40% Ethephon (1600 mg/L), and were sampled at 1h, 3h, 6h, 1, 6, 10, 15, 22 and 31 days after treatment, including leaves, stem apex. The sample treated with water of the same volume as the contrast, all of them were frozen in liquid nitrogen and stored in refrigerator at -80°C until used.

## RNA isolation and *AcB3* genes expression analysis

Total RNA was extracted from samples using Total RNA was extracted from samples using a universal plants RNA extraction kit for Hua Yueyang, according to the manufacturer’s guidelines. 1 µg RNA were used to synthesize the first-strand cDNA by MonScript™ RTIII All-in-One Mix with dsDNase. Primers were designed for real-time quantitative PCR (qRT-PCR) using Primer 5.0 software, and the primer sequences were shown in detail in S7 Table. The cDNA was used as the template, *AcEF1* as the internal reference gene, and each sample was repeated three times for real-time fluorescence quantitative PCR analysis. The reaction was carried out on Roche Lightcycler® 480 instrument using SYBR Green Master Mix (Roche). The reaction system of real-time quantitative PCR was 10 µL, including 1 µL of cDNA, 5 µL of SYBR Green I master, 0.5 µL of 10 µmol/L of forward and reverse primers, and 3 µL of ddH<sub>2</sub>O. The data were analyzed by 2<sup>-ΔΔCT</sup> method [43], and by Excel and Graphpad prism 7.0 softwares. The transcripts of the similar sequences were found by local blast, and the fragments per kilobase of exon model per million mapped reads (FPKM values) were calculated, finally the heatmap was drawn by pheatmap software base on the log<sub>2</sub> (FPKM+1) values. The transcriptome data were uploaded to NCBI (PRJNA639649).

## Results

### Identification and characterization

To comprehensively identify the candidate *B3* proteins in pineapple, 62 *AcB3* genes were found by HMMER 3.0. Removing repetitive (Aco026957 and Aco017311) and short sequences (Aco017668 and Aco017067), the CD-search and SMART analyses were used to verify the presence of the *B3* domains later, one (Aco015073) didn’t contain *B3* domain. Finally, 57 pineapple *B3* proteins were identified.

Gene characteristics, including the protein properties, protein secondary structure and the subcellular localization were analyzed (S1 Table). Among the 57 B3 proteins, the longest protein is 997 aa and the shortest is 137 aa with molecular weights (MWs) from 15.71KDa to 111.32KDa. The isoelectric point (PI) values ranged from 4.61 to 9.9, all of them are hydrophobic proteins. The prediction of subcellular localization shows they are mainly located in nuclear (42), chloroplast (8), cytoplasmic (5), extracellular (1), vacuole (1).

### Genomic location and gene duplication analysis

Chromosomal location analyses (Fig 1) showed that 54 pineapple B3 genes were distributed on 21 out of the 25 Linkage Groups (LG), the rest (Aco030005, Aco030007 and Aco030008) were located on scaffold\_1004. The distribution was uneven, LG14 contained the largest number of 8 B3 genes followed by 7 on LG01 while only one B3 gene was found on LG5, 6, 8, 9, 12, 13, 15, 18. Seven genes were highly concentrated on 9.94Mb to 10.24Mb of LG14.

To investigate the potential duplication events of *B3*, both BLASTP and MCScanX method were used to identify the collinearity of the *B3* gene family in pineapple. 8 segmental duplication events were identified (Fig 2), and the synteny blocks of *B3* were on 12 LGs (LG01, 03, 05, 11, 12, 14, 15, 16, 17, 19, 21 and 24). 5 tandem duplication events were also identified in LG14 and scaffold\_1044 (S2 Table). Calculating the nonsynonymous (Ka) and synonymous (Ks) substitution rates is useful for the study of evolutionary,  $Ka/Ks=1$ , indicates neutral mutation;  $Ka/Ks>1$ , indicates negative (purifying) selection;  $Ka/Ks<1$ , indicates positive (diversifying) selection. In these 13 duplication *B3* gene pairs, 2 of them were “ $Ka/Ks>1$ ”, implying that those had evolved under the effect of positive selection; 10 of them were “ $Ka/Ks<1$ ”, implying that those had evolved under the effect of purifying selection; the only one pair had Ks value equal to 0 and the Ka value is very small, implied they may be the redundant gene.

To further study the potential evolutionary mechanisms of the pineapple *B3* genes superfamily, the collinear relationship between pineapple and other two species *Arabidopsis* (dicotyledon) and rice (monocotyledon) was analyzed (Fig 3). We identified 7 collinear *B3* gene pairs between pineapple and *Arabidopsis*, 39 collinear *B3* gene pairs between pineapple and rice. The details were showed in S3 Table. The number of orthologous events of *AcB3s-OsB3s* was far more than that of *AcB3s-AtB3s*, which indicated the genetic relationship between pineapple and rice is closer than that *Arabidopsis*.

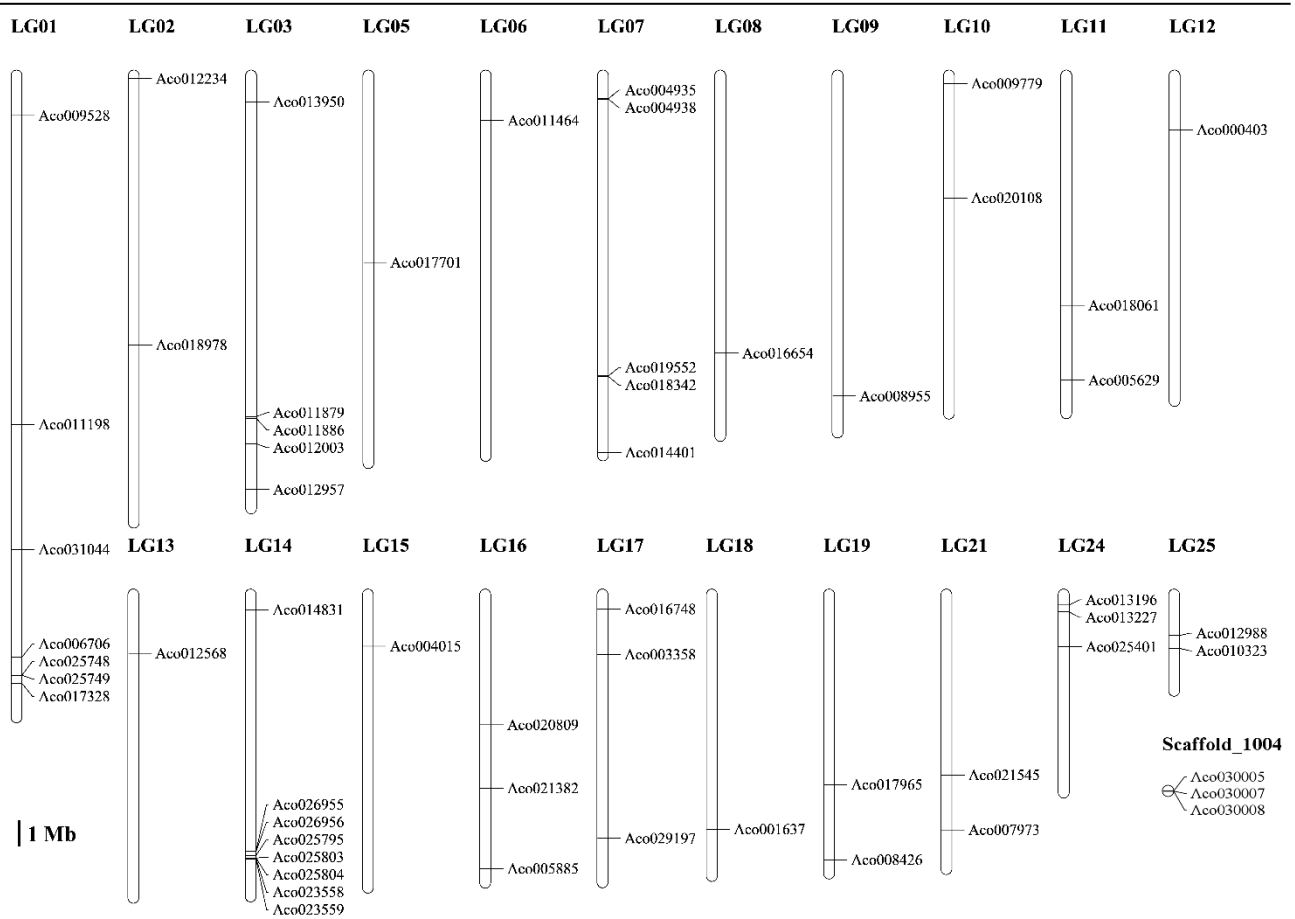

**Fig 1.** Distribution of *AcB3* genes on linkage groups. All 57 *B3* genes are mapped onto 21 linkage groups and one scaffold. “LG number” indicated the chromosome number. The scale is in megabases (Mb).

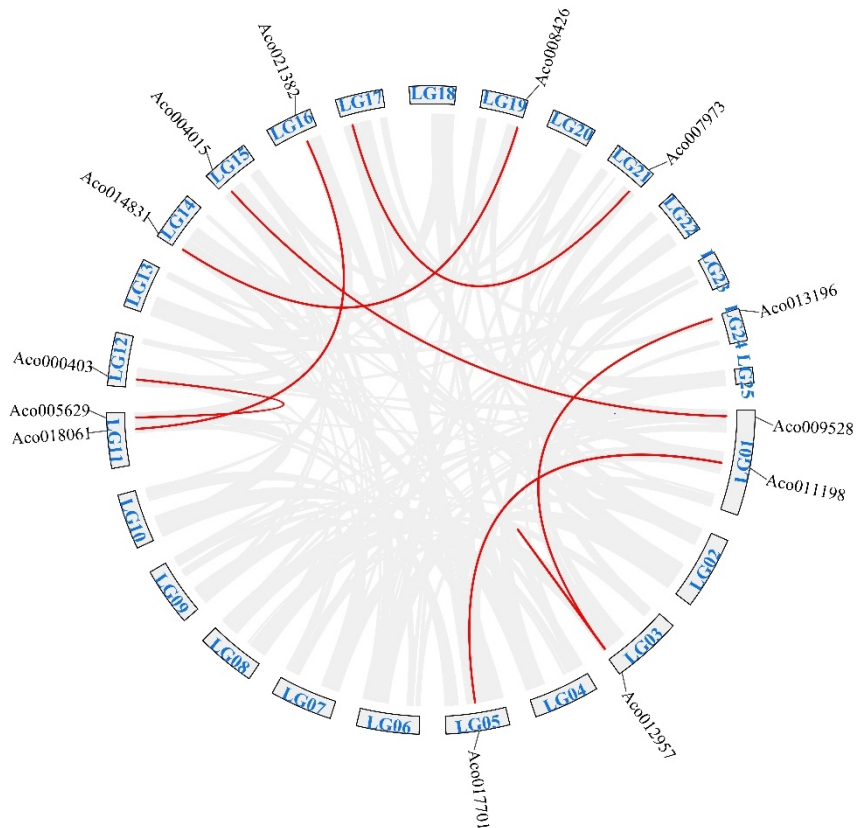

**Fig 2.** Collinearity analysis of *B3* genes in pineapple. Gray lines suggest all segmental duplications and the red lines suggest duplicated *B3* gene pairs. The chromosome number and gene ID are shown.



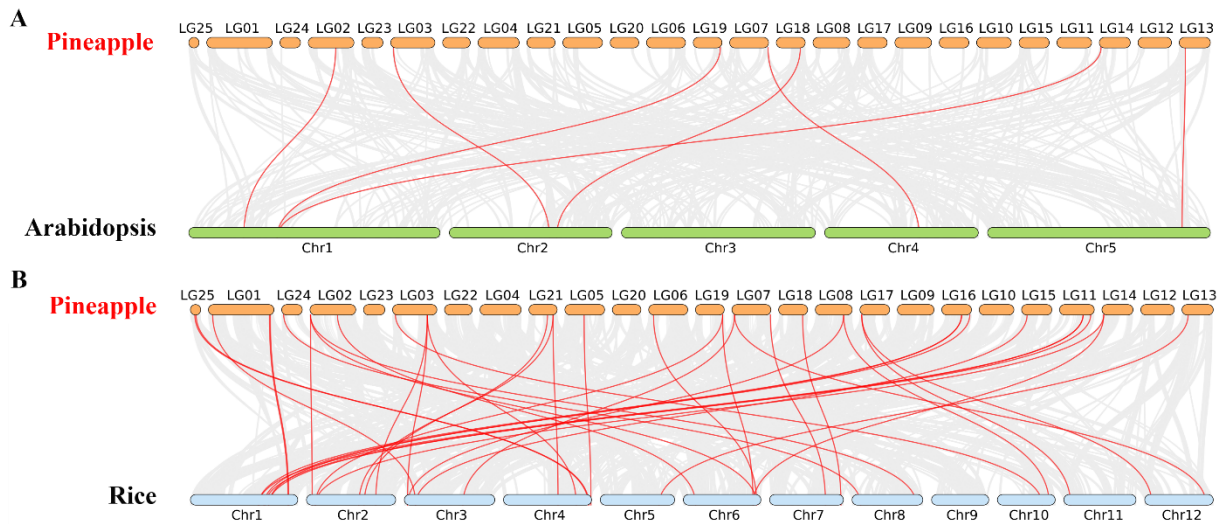

**Fig 3.** Collinearity analysis of *B3* genes between pineapple, *Arabidopsis* and rice. Gray lines indicated the collinear blocks between pineapple and two other plants, the red lines meant the syntenic *B3* gene pairs.

### Phylogenetic analysis among the pineapple, *arabidopsis* and rice *B3* proteins

To study the evolutionary relationship of B3s among pineapple, *Arabidopsis* and rice, we constructed a phylogenetic tree using MEGA 6.0, an unrooted phylogenetic tree was created. In this study, 87 B3 proteins from *Arabidopsis* [13], 86 from rice [13], 57 from pineapple were utilized for the phylogenetic analysis.

As shown in Fig 4, these proteins can be divided into five distinct groups. 27 *AcB3* genes were belonged to *REM*, making it the largest subclass, followed by 19 *AcB3* genes belonged to *ARF*, *RVA*, *HSI* and *LAV* subfamily had 6, 3 and 2 *AcB3* genes, respectively.

### Structural and motif analysis

To investigate the structural diversity of *AcB3* genes, the structures of *AcB3* genes were analysed. 57 *B3* genes were divided into 5 groups according to Fig 4. Different subfamily had different number of exons, ranging from 2–15 and 1–8 in *ARF* and *REM* families, respectively. Most *ARF* subfamily genes had more than 11 exons and more than half *REM* subfamily genes had 3-5 exons. The *LAV* subfamily genes have 6-8 exons, the *HSI* subfamily genes have 12 or 13 exons, and 1 or 2 exons in *RAV* subfamily genes (Fig 5B).

To investigate the protein sequence features of *AcB3s*, we identified 20 different motifs (Fig 5C). Most motifs are 28-50 amino acids in length, and the details of 20 motifs were presented in S4 Table. As the result showed all *AcB3* genes had motifs which annotated as B3 domain. The same group had the similar motifs, while motifs were diverse among different groups. For example, both *HSI* genes had motif2 and 10, while all *ARF* genes had motif3 and 4. Meanwhile, the motif12, 13, 14, 16, 17 and motif19 were only existed in *REM* (Fig 5C). The special motifs in groups may imply diverse functions of *AcB3* superfamily.

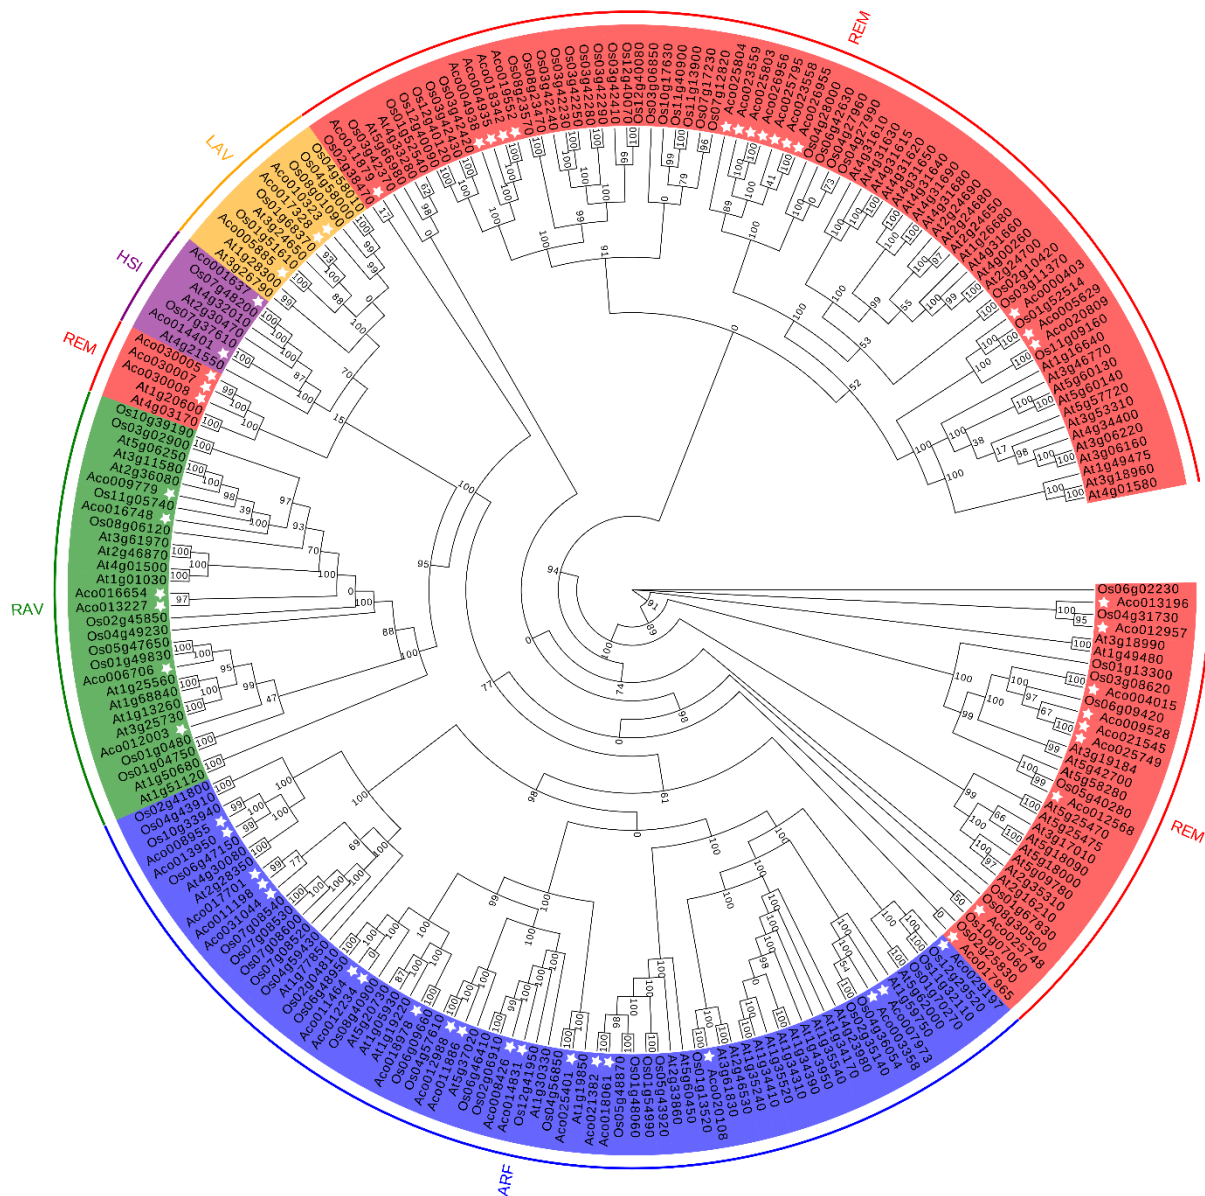

**Fig 4.** The phylogenetic tree of B3 proteins from pineapple (Ac), *Arabidopsis* (At) and rice (Os). The different color area indicated different groups, the white asterisk indicated *B3* genes from pineapple.

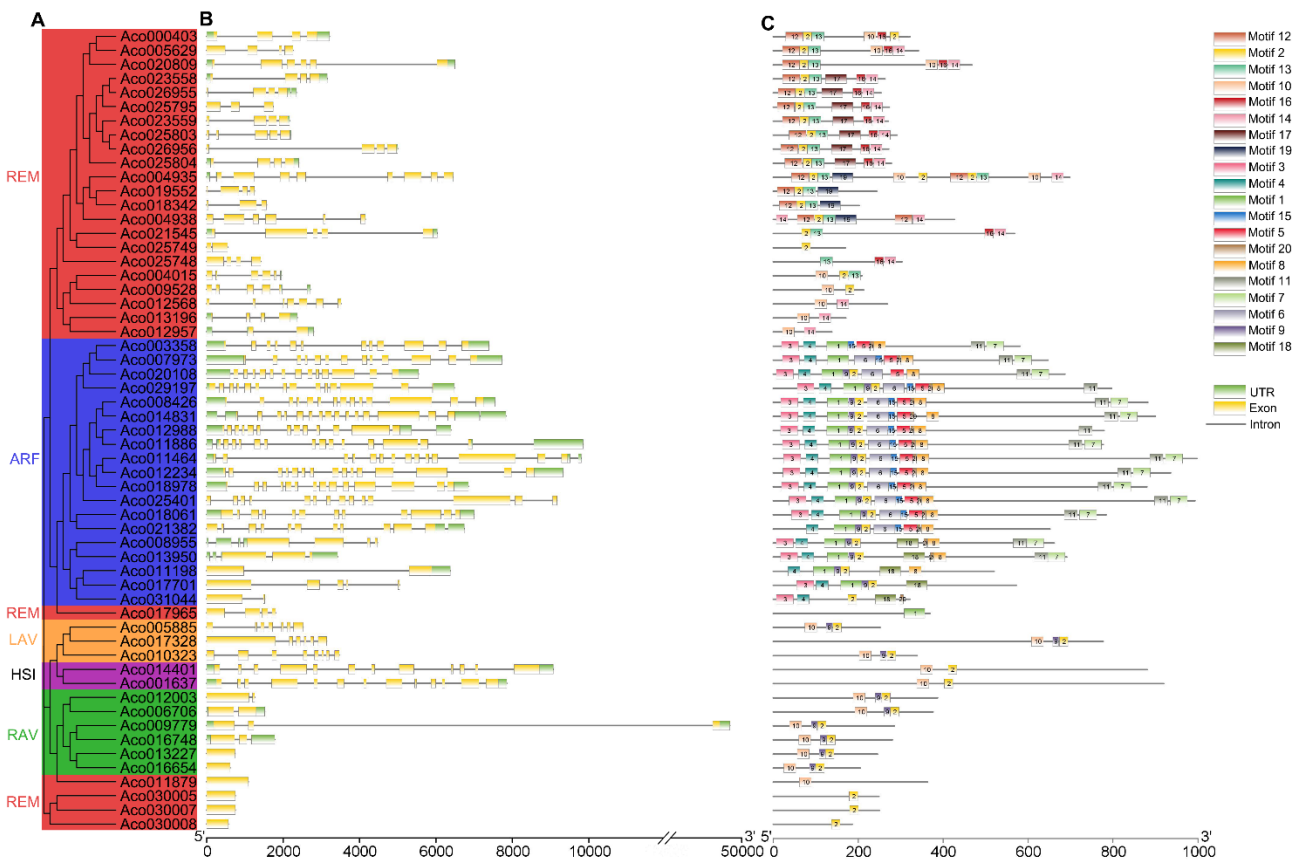

**Fig 5.** The exon-intron structure and motif organization of *AcB3* genes. (A) Phylogenetic relationships of *AcB3* genes. (B) The intron and exon structure of *B3* genes. The green and yellow boxes represent exon and UTR, respectively, the line which go through the boxes represent intron. (C) The motif identification analysis of *AcB3* proteins using MEME. The detailed information of 20 motifs are listed in S4 Table.

### **Cis-acting elements and gene ontology analysis of *B3* genes**

To investigate the potential regulatory role of *B3* genes, we analysed promoters which were 2000bp in length before ATG, The *cis*-elements related to plant hormones were showed in Fig 6. There were 42, 26, 40, 28, 35, 15 *AcB3* genes promoters had *cis*-elements related to abscisic acid, auxin, ethylene, gibberellin, methyl jasmonate and salicylic acid, respectively. Aco009528 and Aco000403 didn't contain these 6 plant hormone related elements. Other *cis*-elements such as light responsiveness element, defense and stress responsiveness element and so on were also found, more details were showed in S5 Table.

We also executed a gene ontology (GO) enrichment analysis of the *AcB3* genes (Fig 7). The prediction of cellular component suggested *AcB3s* participated in cell, organelle, protein-containing complex. The prediction of biological process suggested most *AcB3s* participated in DNA binding then transcription regulator or catalytic activity. Moreover, the prediction of molecular function suggested *AcB3s* mainly involved in metabolic process, cellular process, regulation of biological process and biological regulation. The terms on level 3 were also analysed (S1 Fig; S6 Table), significantly, there was two genes (Aco13950 and Aco006706) involved in the function related to flowering.



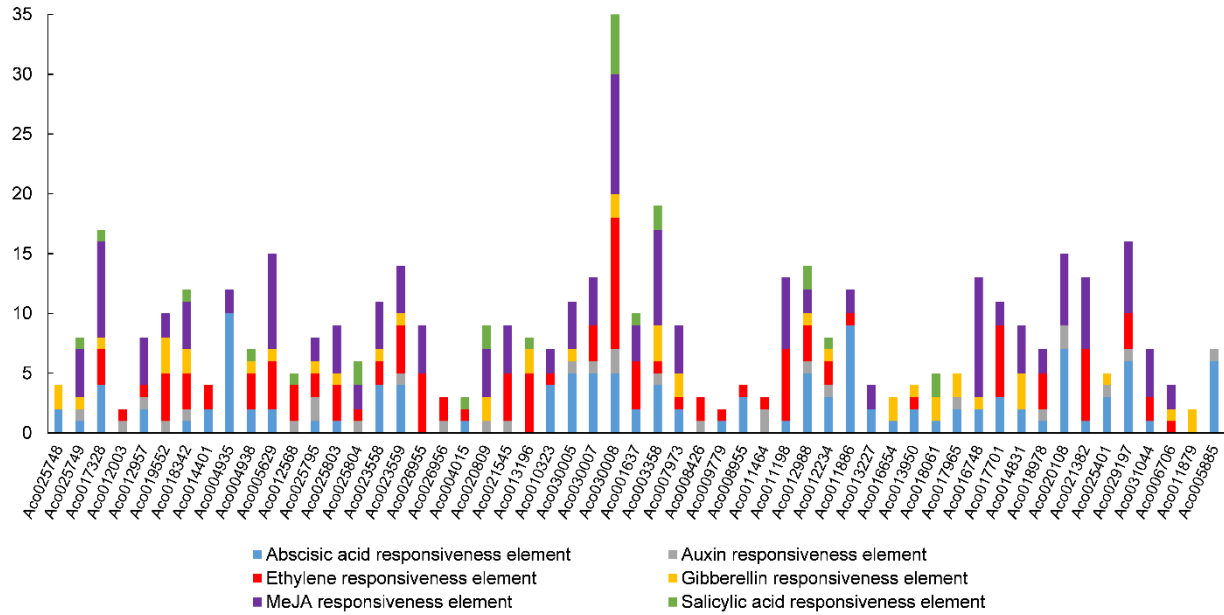

**Fig 6.** B3 promoters *cis*-elements prediction of hormone related. The promoter is 2.0 kb in length.

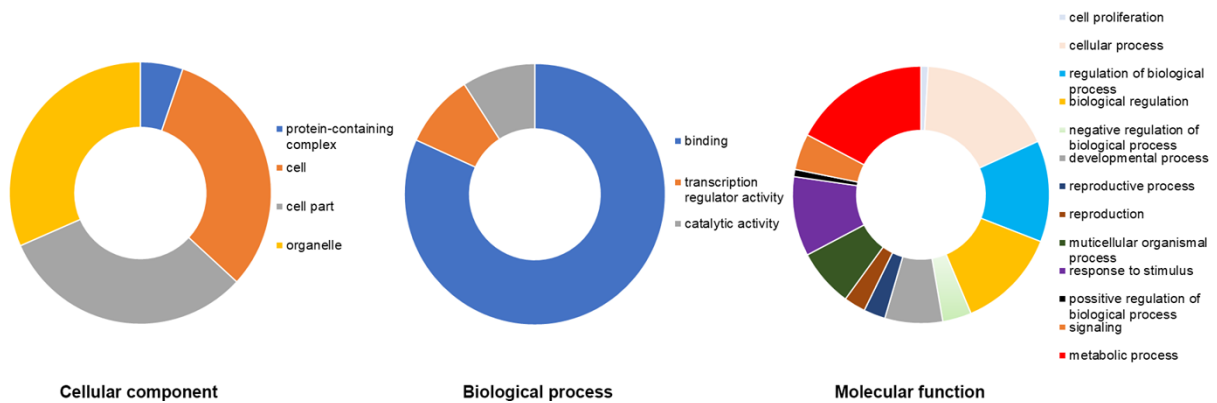

**Fig 7.** Gene ontology analysis of *AcB3* proteins. Three categories (cellular component, biological process and molecular function) and terms on level 2 were showed by different color.

### Expression profiles of *AcB3* genes in stem apex after ethephon treatment

To investigate if *AcB3* genes were regulated by ethephon, the FPKM value of 47 *AcB3* genes after ethephon treatment were collected from RNA-Seq data and presented in a heatmap. The transcripts of 10 *AcB3* genes were not detected in RNA-Seq data, indicated these may expressed in other growth period or tissues. As showed in Fig 8, more than half of *AcB3* genes were highly expressed, 16 *AcB3* genes were up-regulated compared with CK and 6 *AcB3* genes were down-regulated compared with CK. Aco018978, Aco017965, Aco018061, Aco012988, Aco011886, Aco001637 and Aco014831 showed higher level of expression after ethephon treatment. These findings indicated that *AcB3* genes expressed in response to ethephon.

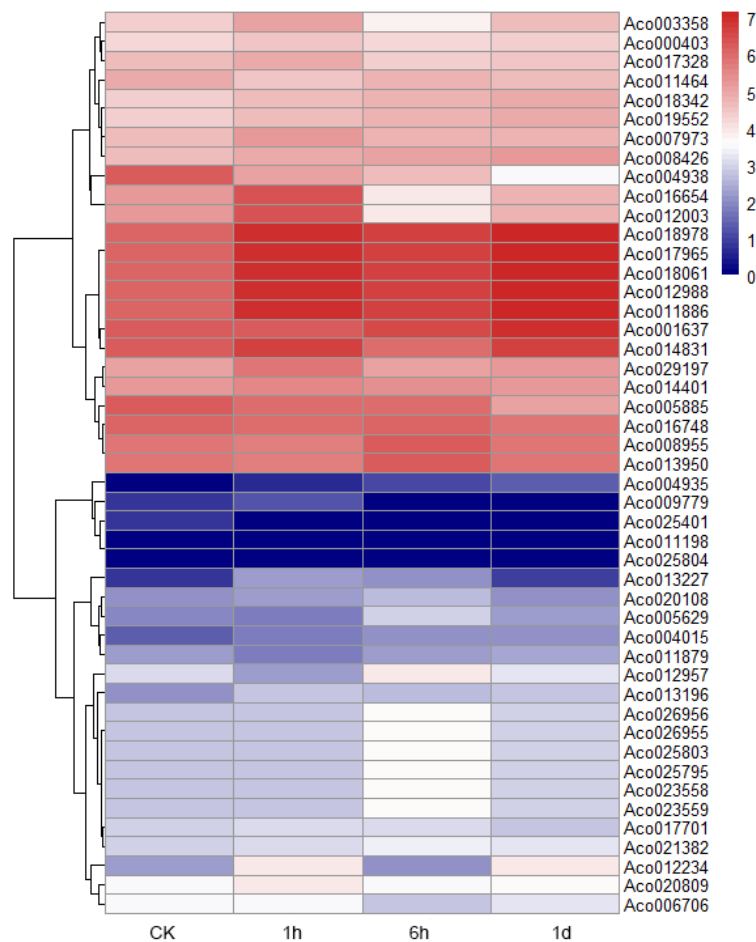

**Fig 8.** Heatmap of *AcB3* genes after ethephon treatment in stem apex. The color scale is based on the  $\log_2$  (FPKM + 1) values

### Expression analysis of *AcB3* genes after ethephon treatment

We found 31d after ethephon treatment in pineapple, the flower bud differentiation was in progress in previous study [44]. In order to identify *AcB3* genes resopnsing to ethylene and the functioning on flowering, 20 genes from different subfamilies were randomly selected to analyze their expression patterns by qRT-PCR. In general, the expression levels of all the selected genes were significantly changed in response to ethylene. In leaves, most genes were up-regulated, while Aco010323, Aco001637, Aco018978 and Aco025401 were significantly down-regulated through all the time points. The expression levels of some genes like Aco004938, Aco026955, Aco020809 and Aco021545 were up-regulated before 1d, and the expression levels of 8 genes were significantly up-regulated in 31d (Fig 9). In stem apex, the of all 20 genes were up-regulated to different degrees. During 0 to 6d after ethylene treatment, all 20 genes were up-regulate, 8 genes reached peak value at 3h, while 11 genes at 6h and 1 gene at 1d (Fig 10). what's more, the expression levels of all 20 genes except Aco012957, Aco020809 and Aco013196 were significantly up-regulated in 31d. In particularly, the expression levels of Aco012003 and Aco004938 were at high level all the time and Aco019552 had a higher level of expression among 20 genes, which indicated these *AcB3* genes may involved in flower bud differentiation.

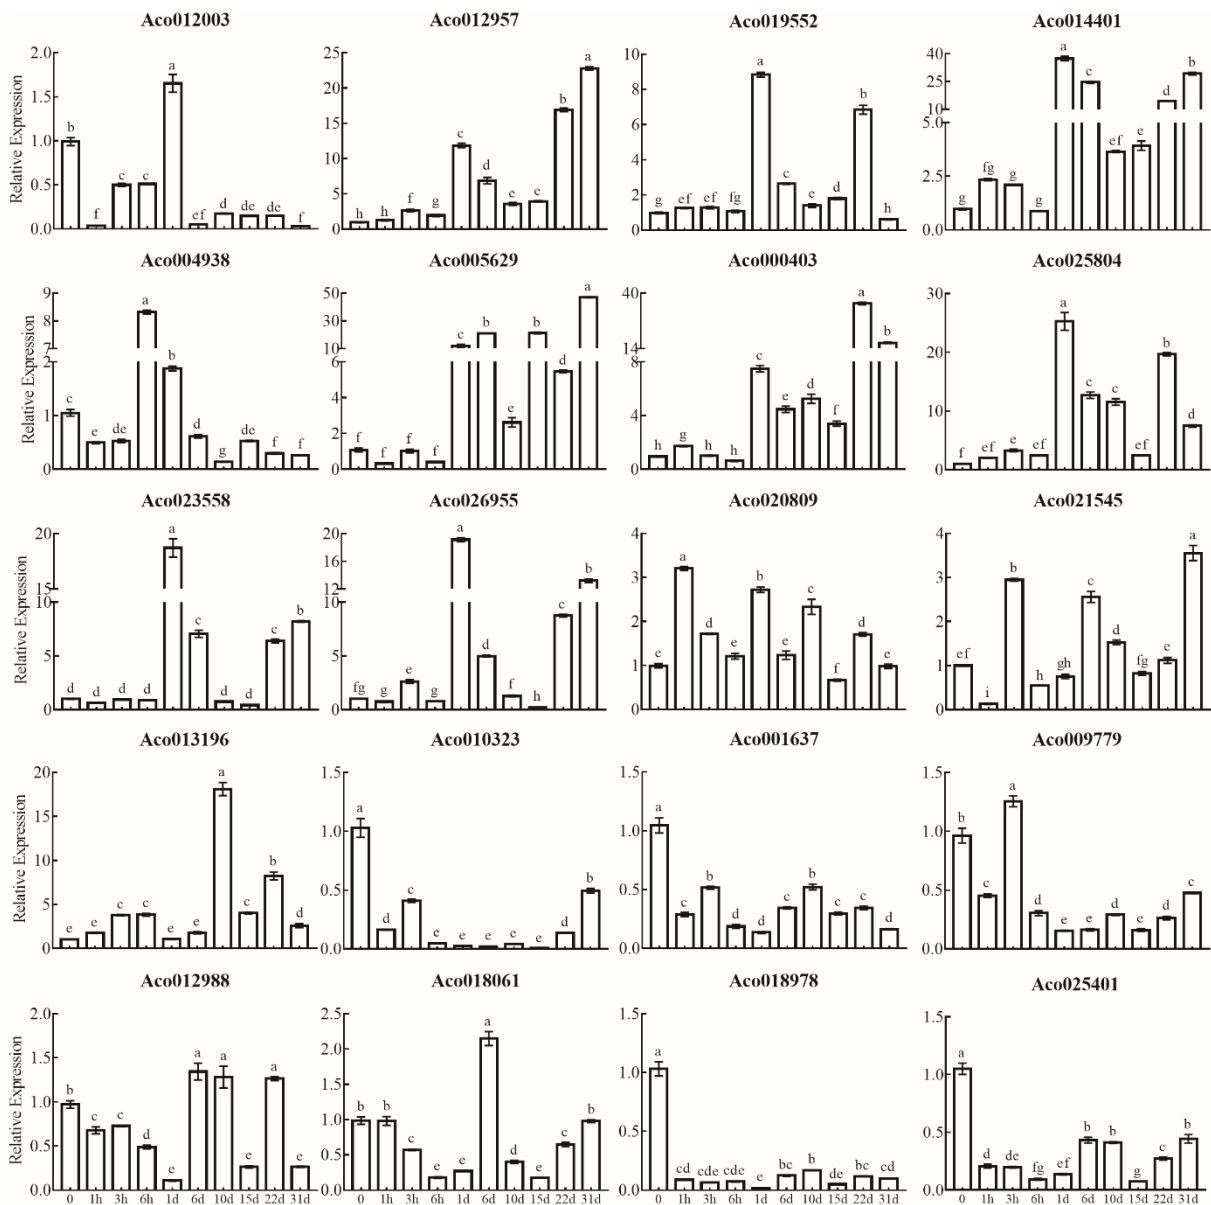

**Fig 9.** Expression analysis of *AcB3* genes after ethephon treatment during floral induction period in leaves. The '0' was regarded as a standard, and *AcEF1* gene was used as internal control. Error bars indicate standard error (SE) based on three replicates. Different letters indicated significant difference, LSD test ( $P \leq 0.05$ ).

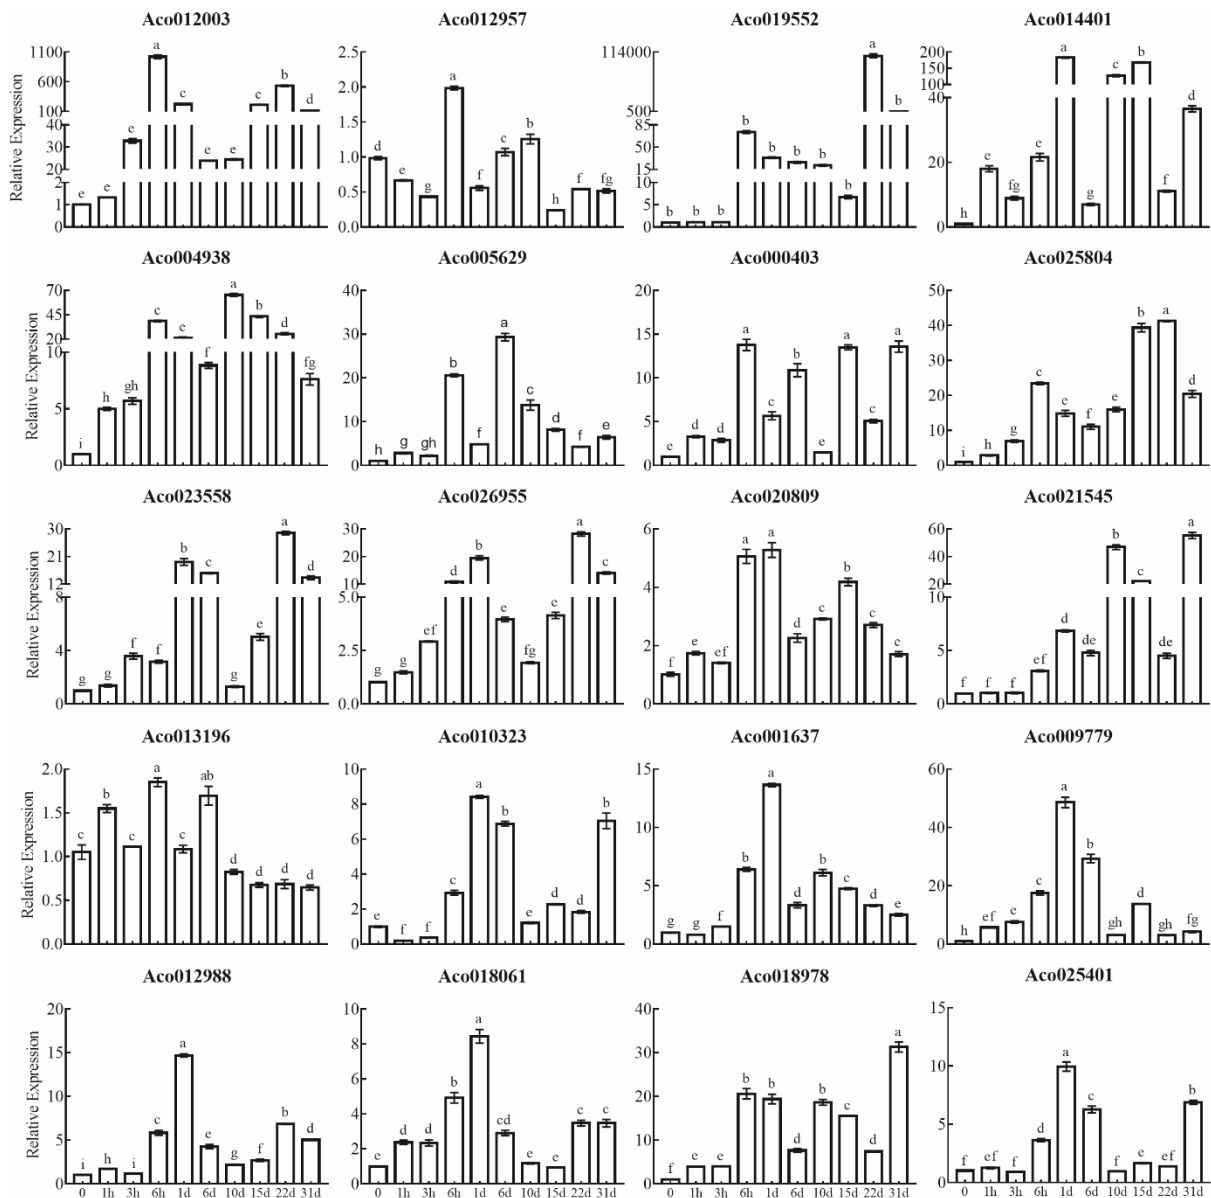

**Fig 10.** Expression analysis of *AcB3* genes after ethephon treatment during floral induction period in stem apex. The '0' was regarded as a standard, and *AcEF1* gene was used as internal control. Error bars indicate standard error (SE) based on three replicates. Different letters indicated significant difference, LSD test ( $P \leq 0.05$ ).

## Discussion

### Characterization and structure of the pineapple *B3* genes superfamily

*B3s* had various functions include regulating on root, seed and flower development, responses of organisms to abiotic stresses, involving in hormone signaling pathways [7, 12]. Genome-wide characterization and expression analyses about *B3* superfamily had been investigated in some plants [8, 15, 45-46]. In this study, a comprehensive genome-wide analysis of the *AcB3* superfamily in pineapple was performed for the first time and 57 *AcB3* genes were identified. The number of *AcB3* genes were less than the other species (*Arabidopsis* and rice), but had same five subfamilies, which indicates that parallel evolutionary events of *B3* genes existed in dicots and monocots.

Different gene structures have different function and the introns have impacts on genes expression and evolution [47]. In this study, most *ARF*, *LAV*, *REM* and *RAV* genes had 3, 4, 1 or 2 and 0 introns in *B3* domain, respectively. This number in HSI was 2. These indicated similar *B3* structure existed in same subfamily during the evolution process. Although 4 motifs were annotated as *B3* domain (S4 Table), all 57 *AcB3* genes had *B3* domain,

this supported the characterization of *B3* genes. Similar protein architecture may have similar function, in this study, most genes had similar classification and number of motifs in the same subfamily, such as *REM* and *ARF*. Together, these results were similar with those of the phylogenetic analysis, which supported the reliability of our subfamily classification.

### **The evolutionary analysis of the *AcB3* genes superfamily**

In this study, 57 *AcB3* genes were classified into five subfamilies by phylogenetic analysis, the same subfamily has similar domains (S2 Fig). Like other species [9], the *REM* subfamily had the most genes followed by *ARF* subfamily. Previous study showed, there were 20 *ARF* genes in pineapple [48]. But in this study, we identified 19, the gene (Aco015073) didn't contain B3 domain. Within the *ARF* subfamily in this study, 14 of them contained B3, Aux\_resp and Aux\_IAA domains, the other 5 have B3 and Aux\_resp domain. This indicated during the evolutionary process the B3 and Aux\_resp domains were more conservative than the Aux\_IAA domain. The *RAV* subfamily usually had one AP2 and one B3 domain, but not all *RAV* protein contained AP2 domain [13, 49]. In this study, Aco009779, Aco016748, Aco013227 and Aco016654 don't contain AP2 domain grouping with *RAV* genes from rice and *Arabidopsis* belonged to *RAV* subfamily. The *REM* subfamily had B3 domains from 1 to 4, multiple B3 domain may be caused by domain duplication events.

Tandem duplication, segmental duplication, and transposition were the mainly gene duplication events, these events promoted the expansion of gene families, and segmental duplication had more proportions than tandem duplication [50-51]. In this study, we identified 8 segmental duplication events and 5 tandem duplication events, most had the Ka/Ks value less than 1, indicated positive selection happened in these genes. Most genes were from *REM* subfamily, one pair belonged to *ARF* subfamily (Aco018061 and Aco021382) which Ka/Ks value was more than 1, they may have different function. Synteny analysis were also carried out with two other species, *Arabidopsis* and rice, which belonged to dicot and monocot plants, respectively. Syntenic gene pairs between pineapple and *Arabidopsis*, rice were 7 and 39, respectively. This indicated pineapple and rice had closer evolutionary distance than pineapple and *Arabidopsis*, which was consistent with previous publications [52-53]. Moreover, genes in the same Syntenic gene pairs between pineapple and rice may had similar structure and function.

### ***Cis*-element analysis in the promoters of *AcB3s***

*Cis*-element was short in length with a core of only several base-pairs, but could regulate gene expression and related to the functions of downstream genes [54-55]. The results illustrate that 6 phytohormones-related *cis*-element were existed in *AcB3* genes superfamily, include abscisic acid, auxin, ethylene, gibberellin, MeJA and salicylic acid responsiveness elements. Most *AcARFs* (17 of 19), both *AcHSIs* and all *AcLAVs* had abscisic acid responsiveness elements, and most *AcREMs* had abscisic acid, ethylene and MeJA responsiveness elements, which indicated they were participated in response to abscisic acid and abiotic stress. Pineapple is a special plant, which ethylene could promote flowering [56]. There were 40 *AcB3s* had ethylene responsiveness elements, 26 *AcB3s* had auxin responsiveness elements which related to development, but only 19 *AcB3s* had both elements, these genes may involve in the process of pineapple flowering induced by ethylene. The other elements were showed (S5 Table), include anaerobic induction, circadian control, defense and stress, drought inducibility, light and low temperature responsiveness element. Most *AcB3s* (52 of 57) had light responsiveness element followed by anaerobic induction element (44 of 57 *AcB3s*). These results suggest that *AcB3s* had various functions and researchs should be carried out for more evidences.

### **The potential roles of differentially expressed *AcB3s***

To investigated gene functions, the gene expression patterns could provide important reference. Previous study showed, *FT* gene which overexpression caused early flower, showed high level of expression in stem apex after ethephon treatment and the time when flower bud differentiation was in progress. In this study, we found all 20



*AcB3* genes had responsiveness to ethylene in stem apex within 1d, only 17 *AcB3* genes in stem apex showed significant up-regulation in 31d. This indicated these may play roles in flower development.

The studies of REM subfamily genes were few, these genes involved in flower development and most of them preferentially expressed in reproductive meristem and were the targets of the key floral transcription factors like *API*, *AP3*, *PI*, *LEAFY* and *SVP* [6, 57-58]. In *Arabidopsis*, *AtREM22* was related to stamen development and *AtREM5* (*VRNI*) was involved in flowering time control [59-60]. In this study, compared the expression in leaves and stem apex, the relative expression of most *AcREMs* in stem apex were higher than leaves, like *REMs* in other species. High level expression of *AcB3s* in stem apex and especially in 31d indicated these genes may have functions in flowering. *AtREM17* (At4g34400) expressed preferentially in flower and was a target of *LEAFY* [6, 8], Aco000403, Aco005629 and Aco020809 have a close genetic distance with At4g34400, they may have similar function in flower development.

It was reported that HSI mainly regulated seed maturation [27], but there was exception. *AtVAL1* (At2g30470) also named as *AtHSI2* which was the target of *FLC* (*Flowering Locus C*) and may play roles in flowering process [61]. Aco001637 changed largely in 6h after ethephon treatment and expressed high level in 31d, this gene was classified together with At2g30470 by phylogenetic analysis, indicated similar function in pineapple.

Auxin has important roles on plants growth and development, *ARF* genes could response to auxin and were best studied [62]. ARFs involved in flowering process, for example, *AtARF3* regulate floral meristem determinacy by *AG* and *AP2* [63]. In tomato, most *ARFs* had higher expression level in flower buds and flower compared in fruit [64]. In this study, *ARFs* showed low relative expression in leaves but high in stem apex, all of them up-regulated significantly in 31d, indicated they may involve in flowering process. Moreover, all of them up-regulated significantly in 6h after ethephon treatment, this suggested they may response to ethylene. *Arabidopsis ARF6* and *ARF8* (At5g37020) coordinate the transition from immature to mature fertile flowers [65], Aco012988 classified together with At5g37020 may has similar function. Phosphorus was necessary for plant growth and development, the concentration of phosphorus had influence on flowering [66]. To adapt low phosphorus environment, ethylene can adjust the relative elongation of roots and change the signal transduction pathway of phosphoric acid [67]. As a gene of ARF family, *OsARF16* (Os06g09660) had diverse function involved in phosphate transport [68]. Intriguing, Aco018978 was classified together with Os06g09660, Aco018978 up-regulated significantly after ethephon treatment and in 31d, suggested that ethylene may increase the length of root and high expression level of Aco018978 may increase phosphate transport to the flower formation in the future.

## Conclusions

In this study, 57 *AcB3* genes were identified in the pineapple genome for the first time. They are unevenly distributed on the chromosomes, and segmental duplications contributed to the expansion of the *AcB3* family. It was also found that *B3* genes from pineapple and rice have closer genetic distance. Phylogeny analysis comparing with *Arabidopsis* and rice classifies these genes into five major classes (*REM*, *ARF*, *RAV*, *HSI* and *LAV*). *Cis*-element analysis discovered several phytohormone and stresses responsive elements in the promoter region of the *AcB3s*. Moreover, most selected *AcB3* genes express in response to ethylene and show high level expression in flower bud differentiation period, which disclosed that these have roles in flowering and responding to ethylene signal. Our research provides new insight into the evolution and divergence of *AcB3* genes and helps in identifying candidate genes for functional characterization in flowering. Furthermore, these results will also serve as a foundation and reference for future research regarding the molecular mechanisms in ethylene induced pineapple flowering.

## Author Contributions

Conceptualization: Cheng Cheng Ruan, Zhe Chen.

Methodology: Cheng Cheng Ruan, Zhe Chen.

Resources: Xianghe Wang, Li Jun Guo.

Software Formal analysis: Hong Yan Fan, Fu Chu Hu.

Visualization: Zhi Wen Luo.

Writing - Original Draft: Cheng Cheng Ruan.

Writing - Review & Editing: Zhi Li Zhang.

All authors approved the final manuscript.

## Funding

This study was supported by the National Natural Science Foundation of China (31960589 and 31260460), Young Science and Technology persons Academic Innovation Program of Hainan Association for Science and Technology (QCXM201803).

## Conflicts of Interest

The authors declare no conflicts of interest.

## References

1. Inukai S, Kock KH, Bulyk ML. Transcription factor-DNA binding: beyond binding site motifs. *Curr. Opin. Genet. Dev.* 2017; 43:110-119.
2. Wang ZP, Guo YY, Liang MJ. Research progress on related database for animal transcription factors. *Anim Husb Feed Sci.* 2014; 35(12):28-30.
3. Qu LJ, Zhu YX. Transcription factor families in *Arabidopsis*: major progress and outstanding issues for future research. *Curr. Opin. Plant Biol.* 2006; 9(5):544-549.
4. Imaizumi T, Kay SA. Photoperiodic control of flowering: not only by coincidence. *Trends Plant Sci.* 2006; 11(11):550-558.
5. Riechmann JL, Ratcliffe OJ. A genomic perspective on plant transcription factors. *Curr. Opin. Plant Biol.* 2000; 3(5):423-434.
6. Mantegazza O, Gregis V, Mendes MA, Morandini P, Alves-Ferreira M, Patreze CM, et al. Analysis of the *arabidopsis* REM gene family predicts functions during flower development. *Ann. Bot.* 2014; 114(7):1507-1515.
7. Swaminathan K, Peterson K, Jack T. The plant B3 superfamily. *Trends Plant Sci.* 2008; 13(12):647-655.
8. Peng FY, Weselake RJ. Genome-wide identification and analysis of the B3 superfamily of transcription factors in Brassicaceae and major crop plants. *Theor. Appl. Genet.* 2013; 126(5):1305-1319.
9. Wang YJ, Deng DX, Zhang R, Wang SX, Bian YL, Yin ZT. Systematic analysis of plant-specific B3 domain-containing proteins based on the genome resources of 11 sequenced species. *Mol. Biol. Rep.* 2012; 39(5):6267-6282.
10. Sun TT, Wang DW, Gong DP, Chen L, Chen YQ, Sun YH. Genome-wide identification and bioinformatic analysis of B3 superfamily in tomato. *J Plant Genet Res.* 2015; 16(4):806-814.
11. Liu YH, Dong ZP. The function and structure of plant B3 domain transcription factor. *MolPlant Breed.* 2017; 15(5):1868-1873.
12. Suzuki M, McCarty DR. Functional symmetry of the B3 network controlling seed development. *Curr. Opin. Plant Biol.* 2008; 11(5):548-553.
13. Romanel EA, Schrago CG, Couñago RM, Russo CA, Alves-Ferreira M. Evolution of the B3 DNA binding superfamily: new insights into REM family gene diversification. *PloS one.* 2009; 4(6):e5791.
14. Wu JJ, Yu SC, Liu ZG, Fu Y, Zhou MB. Genome identification and expression pattern analysis of *Phyllostachys edulis* B3 family. *Chin J Agric Biotechnol.* 2019; 27(1):43-54.
15. Verma S, Bhatia S. A comprehensive analysis of the B3 superfamily identifies tissue-specific and stress-responsive

- 
- genes in chickpea (*Cicer arietinum* L.). 3 Biotech. 2019; 9(9):346.
16. Chandler JW. Auxin response factors. Plant, Cell Environ. 2016; 39(5):1014-1028.
  17. Li SB, Xie ZZ, Hu CG, Zhang JZ. A review of *auxin response factors (ARFs)* in plants. Front Plant Sci. 2016; 7:47.
  18. Ellis CM, Nagpal P, Young JC, Hagen G, Guilfoyle TJ, Reed JW. *AUXIN RESPONSE FACTOR1* and *AUXIN RESPONSE FACTOR2* regulate senescence and floral organ abscission in *Arabidopsis thaliana*. Development. 2005; 132(20):4563-4574.
  19. Wilmoth JC, Wang SC, Tiwari SB, Joshi AD, Hagen G, Guilfoyle TJ, et al. *NPH4/ARF7* and *ARF19* promote leaf expansion and auxin-induced lateral root formation. Plant J. 2005; 43(1):118-130.
  20. Stone SL, Kwong LW, Yee KM, Pelletier J, Lepiniec L, Fischer RL, et al. *LEAFY COTYLEDON2* encodes a B3 domain transcription factor that induces embryo development. P Natl Acad Sci USA. 2001; 98(20):11806-11811.
  21. Freitas NC, Barreto HG, Torres LF, Freire LL, Rodrigues LAZ, Diniz LEC, et al. In silico and in vivo analysis of *ABI3* and *VAL2* genes during somatic embryogenesis of *Coffea arabica*: competence acquisition and developmental marker genes. Plant Cell Tiss Org. 2019; 137(3):599-611.
  22. Sugliani M, Rajjou L, Clerckx EJ, Koornneef M, Soppe WJ. Natural modifiers of seed longevity in the *Arabidopsis* mutants *abscisic acid insensitive3-5 (abi3-5)* and *leafy cotyledon1-3 (lec1-3)*. New Phytol. 2009; 184(4):898-908.
  23. Khandelwal A, Cho SH, Marella H, Sakata Y, Perroud P-F, Pan A, et al. Role of ABA and *ABI3* in desiccation tolerance. Science. 2010; 327(5965):546-546.
  24. Brady SM, Sarkar SF, Bonetta D, McCourt P. The *ABSCISIC ACID INSENSITIVE 3 (ABI3)* gene is modulated by farnesylation and is involved in auxin signaling and lateral root development in *Arabidopsis*. Plant J. 2003; 34(1):67-75.
  25. Stone SL, Braybrook SA, Paula SL, Kwong LW, Meuser J, Pelletier J, et al. *Arabidopsis LEAFY COTYLEDON2* induces maturation traits and auxin activity: implications for somatic embryogenesis. P Natl Acad Sci USA. 2008; 105(8):3151-3156.
  26. Veerappan V, Wang J, Kang M, Lee J, Tang YH, Jha AK, et al. A novel *HSI2* mutation in *Arabidopsis* affects the PHD-like domain and leads to derepression of seed-specific gene expression. Planta. 2012; 236(1):1-17.
  27. Chen Nc, Veerappan V, Abdelmageed H, Kang M, Allen RD. *HSI2/VAL1* silences *AGL15* to regulate the developmental transition from seed maturation to vegetative growth in *Arabidopsis*. Plant Cell. 2018; 30(3):600-619.
  28. Li XJ, Li M, Zhou Y, Hu S, Hu R, Chen Y, et al. Overexpression of cotton *RAVI* gene in *Arabidopsis* confers transgenic plants high salinity and drought sensitivity. PLoS One. 2015; 10(2):e0118056.
  29. Castillejo C, Pelaz S. The balance between *CONSTANS* and *TEMPRANILLO* activities determines *FT* expression to trigger flowering. Curr. Biol. 2008; 18(17):1338-1343.
  30. Mylne JS, Barrett L, Tessadori F, Mesnage S, Johnson L, Bernatavichute YV, et al. *LHP1*, the *Arabidopsis* homologue of *HETEROCHROMATIN PROTEIN1*, is required for epigenetic silencing of *FLC*. P Natl Acad Sci USA. 2006; 103(13):5012-5017.
  31. Caselli F, Beretta VM, Mantegazza O, Petrella R, Leo G, Guazzotti A, et al. *REM34* and *REM35* control female and male gametophyte development in *Arabidopsis thaliana*. Front Plant Sci. 2019; 10:1351.
  32. Fassinou Hotegni VN, Lommen WJ, Agbossou EK, Struik PC. Trade-offs of flowering and maturity synchronisation for pineapple quality. PloS one. 2015; 10(11):e0143290.
  33. Friend D. Effect of night temperature on flowering and fruit size in pineapple (*Ananas comosus* [L.] Merrill). Botanical Gazette. 1981; 142(2):188-190.
  34. Friend DJ, Lydon J. Effects of daylength on flowering, growth, and CAM of pineapple (*Ananas comosus* [L.] Merrill). Botanical Gazette. 1979; 140(3):280-283.
  35. Cunha GAPd. Applied aspects of pineapple flowering. Bragantia. 2005; 64(4):499-516.
  36. Zhang ZL, Fan HY, Hua M, He F. Induction of pineapple flowering and underlying physiological and molecular bases. Chin J Trop Crop. 2012; 33(5):950-955.

37. Voorrips R. MapChart: software for the graphical presentation of linkage maps and QTLs. *J. Hered.* 2002; 93(1):77-78.
38. Wang YP, Tang HB, DeBarry JD, Tan X, Li JP, Wang XY, et al. MCScanX: a toolkit for detection and evolutionary analysis of gene synteny and collinearity. *Nucleic Acids Res.* 2012; 40(7):e49-e49.
39. Chen CJ, Chen H, Zhang Y, Thomas HR, Frank MH, He YH, et al. TBtools-an integrative toolkit developed for interactive analyses of big biological data. *Mol Plant.* 2020; 13(8):1194-1202.
40. Librado P, Rozas J. DnaSP v5: a software for comprehensive analysis of DNA polymorphism data. *Bioinformatics.* 2009; 25(11):1451-1452.
41. Guindon S, Dufayard J-F, Lefort V, Anisimova M, Hordijk W, Gascuel O. New algorithms and methods to estimate maximum-likelihood phylogenies: assessing the performance of PhyML 3.0. *Syst. Biol.* 2010; 59(3):307-321.
42. Bailey TL, Boden M, Buske FA, Frith M, Grant CE, Clementi L, et al. MEME SUITE: tools for motif discovery and searching. *Nucleic Acids Res.* 2009; 37:W202-W208.
43. Livak KJ, Schmittgen TD. Analysis of relative gene expression data using real-time quantitative PCR and the  $2^{-\Delta\Delta CT}$  method. *Methods.* 2001; 25(4):402-408.
44. Ruan CC, Nian YW, Hu FC, Wang XH, Fan HY, Wu FZ, et al. Expression and analysis of *FT* genes in pineapple flowering induced by ethephon. *J Fruit Sci.* 2019; 36(12):1648-1657.
45. Ahmad B, Zhang SL, Yao J, Rahman MU, Hanif M, Zhu YX, et al. Genomic organization of the B3-domain transcription factor family in grapevine (*Vitis vinifera* L.) and expression during seed development in seedless and seeded cultivars. *Int J Mol Sci.* 2019; 20(18):4553.
46. Xia F, Sun TT, Yang SJ, Wang X, Chao JT, Li XX, et al. Insight into the B3 transcription factor superfamily and expression profiling of B3 genes in axillary buds after topping in tobacco (*Nicotiana tabacum* L.). *Genes.* 2019; 10(2):164.
47. Su ZX, Wang LL, Li WM, Zhao LH, Huang XY, Azam SM, et al. Genome-wide identification of *auxin response factor (ARF)* genes family and its tissue-specific prominent expression in pineapple (*Ananas comosus*). *Trop Plant Biol.* 2017; 10:86-96.
48. Alvarez JP, Goldshmidt A, Efroni I, Bowman JL, Eshed Y. The *NGATHA* distal organ development genes are essential for style specification in *Arabidopsis*. *Plant Cell.* 2009; 21(5):1373-1393.
49. Gu ZL, Steinmetz LM, Gu X, Scharfe C, Davis RW, Li W-H. Role of duplicate genes in genetic robustness against null mutations. *Nature.* 2003; 421(6918):63-66.
50. Cannon SB, Mitra A, Baumgarten A, Young ND, May G. The roles of segmental and tandem gene duplication in the evolution of large gene families in *Arabidopsis thaliana*. *BMC Plant Biol.* 2004; 4(1):10.
51. Liu CY, Xie T, Chen CJ, Luan AP, Long JM, Li CH, et al. Genome-wide organization and expression profiling of the R2R3-MYB transcription factor family in pineapple (*Ananas comosus*). *BMC Genomics.* 2017; 18(1):1-16.
52. Xie T, Chen CJ, Li CH, Liu JR, Liu CY, He YH. Genome-wide investigation of WRKY gene family in pineapple: evolution and expression profiles during development and stress. *BMC Genomics.* 2018; 19(1):490.
53. Rosas U, Mei Y, Xie Qg, Banta JA, Zhou RW, Seufferheld G, et al. Variation in *Arabidopsis* flowering time associated with *cis*-regulatory variation in *CONSTANS*. *Nat Commun.* 2014; 5(1):1-8.
54. Lieberman-Lazarovich M, Yahav C, Israeli A, Efroni I. Deep conservation of *cis*-element variants regulating plant hormonal responses. *Plant Cell.* 2019; 31(11):2559-2572.
55. Maruthasalam S, Shiu LY, Loganathan M, Lien WC, Liu YL, Sun CM, et al. Forced flowering of pineapple (*Ananas comosus* cv. Tainon 17) in response to cold stress, ethephon and calcium carbide with or without activated charcoal. *Plant Growth Regul.* 2010; 60(2):83-90.
56. Villarino GH, Hu QW, Manrique S, Flores-Vergara MA, Sehra B, Robles L, et al. Temporal and spatial domain-specific transcriptomic analysis of a vital reproductive meristem in *Arabidopsis thaliana*. *Plant Physiol.* 2016; 171(1):42-61.
57. Franco-Zorrilla JM, Cubas P, Jarillo JA, Fernández-Calvín B, Salinas J, Martínez-Zapater JM. *AtREM1*, a member

---

of a new family of B3 domain-containing genes, is preferentially expressed in reproductive meristems. *Plant Physiol.* 2002; 128(2):418-427.

59. Romanel E, Das P, Amasino RM, Traas J, Meyerowitz E, Alves-Ferreira M. *Reproductive Meristem 22* is a unique marker for the early stages of stamen development. *Int. J. Dev. Biol.* 2011; 55(6):657-664.
60. Levy YY, Mesnage S, Mylne JS, Gendall AR, Dean C. Multiple roles of *Arabidopsis VRN1* in vernalization and flowering time control. *Science.* 2002; 297(5579):243-246.
61. Wu BX, Zhang MM, Su SC, Liu HH, Gan JH, Ma JB. Structural insight into the role of *VAL1* B3 domain for targeting to *FLC* locus in *Arabidopsis thaliana*. *Biochem Biophys Res Commun.* 2018; 501(2):415-422.
62. Liu YH, Dong ZP. The function and structure of plant B3 domain transcription factor. *Mol Plant Breed.* 2017; 15(5):1868-1873.
63. Liu XG, Dinh TT, Li DM, Shi BH, Li YP, Cao XW, et al. *AUXIN RESPONSE FACTOR 3* integrates the functions of *AGAMOUS* and *APETALA 2* in floral meristem determinacy. *Plant J.* 2014; 80(4):629-641.
64. Kumar R, Tyagi AK, Sharma AK. Genome-wide analysis of *auxin response factor (ARF)* gene family from tomato and analysis of their role in flower and fruit development. *Mol. Genet. Genomics.* 2011; 285(3):245-260.
65. Nagpal P, Ellis CM, Weber H, Ploense SE, Barkawi LS, Guilfoyle TJ, et al. *Auxin response factors ARF6* and *ARF8* promote jasmonic acid production and flower maturation. *Development.* 2005; 132(18):4107-4118.
66. Scagel C, Schreiner RP. Phosphorus supply alters tuber composition, flower production, and mycorrhizal responsiveness of container-grown hybrid *Zantedeschia*. *Plant Soil.* 2006; 283:323-337.
67. Ma Z, Baskin TI, Brown KM, Lynch JP. Regulation of root elongation under phosphorus stress involves changes in ethylene responsiveness. *Plant Physiol.* 2003; 131(3):1381-1390.
68. Shen CJ, Wang SK, Zhang SN, Xu YX, Qian Q, Qi Yh, et al. *OsARF16*, a transcription factor, is required for auxin and phosphate starvation response in rice (*Oryza sativa* L.). *Plant, Cell Environ.* 2013; 36(3):607-620.
